# Supplementary material for: International Olympic Committee consensus statement: methods for recording and reporting of epidemiological data on injury and illness in sport 2020 (including STROBE Extension for Sport Injury and Illness Surveillance (STROBE-SIIS))
Source: PubMed Central journal article supplement — Br J Sports Med. 2020 Feb 18;54(7):372–89. doi: 10.1136/bjsports-2019-101969 (PMC7146946; doi:10.1136/bjsports-2019-101969), 2020-02-18
Supplement: bjsports-2019-101969supp001.pdf [file bjsports-2019-101969supp001.pdf]

## Appendix 1: Case study: Tackle injuries to ball carriers in rugby

### *The data set*

A study was conducted in which video records of every tackle that occurred in 434 professional rugby matches was coded on a range of dimensions, including the location on the body at which the tackler(s) contacted the ball carrier ('tackle height').<sup>1</sup> The information in the table has been restricted to that from 43 366 tackles in which a single tackler tackled a ball carrier (i.e. the 100 tackle events per match that met this criteria). For the purposes of the example below, an injury is defined as 'any injury sustained by a ball carrier during a rugby tackle that required them to be removed from the field of play for the remainder of the match'.

### *Different denominators: different perspectives on risk*

Rates of injury have been presented in Table 1 as 'per 10 000 tackles' and 'per 10 000 player-hours'. If data were reported using only the time-based denominator, as has been the case in most studies of sports injury epidemiology, the conclusion drawn would be that 'high' and 'middle' tackles are those that carry the greatest risk to ball carriers. When the relative frequency of the tackles is considered, and the rates are presented on a 'per 10 000 tackles' basis, head/neck tackles place ball carriers at the greatest risk of injury *when they occur*.

**Table 1** Injury rates to ball carriers in rugby tackles, expressed via event-based and time-based denominators.

| Injuries requiring the player to be removed from the match |                   |                    |                         |                                             |
|------------------------------------------------------------|-------------------|--------------------|-------------------------|---------------------------------------------|
| Tackle height                                              | Tackles per match | Per 10 000 tackles | Per 10 000 player-hours | Percent of injuries per 10 000 player hours |
| Head/neck                                                  | 4 ± 2             | 43 (23 to 79)      | 4 (2 to 8)              | 13 (7 to 23)                                |
| High                                                       | 37 ± 10           | 12 (8 to 17)       | 11 (8 to 16)            | 36 (26 to 47)                               |
| Middle                                                     | 44 ± 9            | 9 (6 to 13)        | 10 (7 to 15)            | 32 (23 to 43)                               |
| Low                                                        | 15 ± 5            | 16 (9 to 26)       | 6 (3 to 10)             | 19 (12 to 29)                               |

The different perspectives provided by 'per-event' and 'per-time' denominators can be helpful in identifying injury prevention priorities. If the overall risk of injuries was considered 'unacceptably high' by those responsible for managing the risks in the sport, then reducing the numbers of the most

common tackles in the game would have the greatest effect; together ‘high’ and ‘middle’ tackles account for over two-thirds of all tackle injuries requiring ball carriers to be removed from the pitch. Reducing the numbers of such tackles, or the characteristics of them, would probably require major changes to the sport of rugby. If, however, the overall degree of risk was considered ‘acceptable’, then focussing on decreasing the number of ‘head and neck’ tackles would have a modest effect on overall injury rates, but reduce the occurrence of a particularly risky element of the sport (note: head/neck tackles are not permitted within the laws of rugby, but sometimes occur).

The type of exposure measures that can form the basis of risk statistics is presented in Table 2, along with a range of the risk measures that have been reported in studies of team sports injury epidemiology. The examples are taken from the same study discussed above.

**Table 2** A range of exposure and risk statistics derived from injury surveillance data - examples from a study of rugby tackle injuries.<sup>1</sup>

| Statistic                                                       | Value  | Calculation | Explanation                                                                                                  | Comment                                                                                                                                                                                                                                       |
|-----------------------------------------------------------------|--------|-------------|--------------------------------------------------------------------------------------------------------------|-----------------------------------------------------------------------------------------------------------------------------------------------------------------------------------------------------------------------------------------------|
| <b>Injury statistics</b>                                        |        |             |                                                                                                              |                                                                                                                                                                                                                                               |
| Number of injuries (carrier injury replacements in 434 matches) | 53     | Nil         | Count of the number of tackler injuries requiring the injured player to be replaced observed in 434 matches. | The 'numerator' used for calculating the rate of tackler replacement injuries per unit of time or per tackle. Absolute numbers and costs of injuries <i>are</i> of interest to risk managers, especially when provided in parallel with rates |
| Number of injured players (some were injured more than once)    | 48     | Nil         |                                                                                                              | The numerator for calculating 'injury risk'                                                                                                                                                                                                   |
| <b>Exposure measures</b>                                        |        |             |                                                                                                              |                                                                                                                                                                                                                                               |
| Player hours in 434 matches                                     | 17 360 | 30*579      | Thirty players (15 from each team) multiplied by 579 (hours of play in 434 matches of 80 minutes duration)   | This number provides a 'time-window' denominator. Usually it is assumed that time lost for yellow and red cards, or time gained for 'extra time' is negligible and is ignored.                                                                |
| Number of single tackler tackle events in 434 matches           | 43 366 | Nil         | All tackles in 434 matches were coded, regardless of whether they resulted in injury                         | This number forms an 'event-based' denominator.                                                                                                                                                                                               |

| Statistic                                            | Value  | Calculation           | Explanation                                                                                                                                                                                                            | Comment                                                                                                                                                                                                                                                                   |
|------------------------------------------------------|--------|-----------------------|------------------------------------------------------------------------------------------------------------------------------------------------------------------------------------------------------------------------|---------------------------------------------------------------------------------------------------------------------------------------------------------------------------------------------------------------------------------------------------------------------------|
| Number of players who appeared in the 434 matches    | 1403   | Nil                   |                                                                                                                                                                                                                        | This is a count of the size of the cohort across the entire study period; it is used as the denominator for calculating 'injury risk'.                                                                                                                                    |
| Number of full player matches                        | 13 020 | 30*434                | Thirty players (15 from each team) multiplied by 434 matches                                                                                                                                                           | This number provides a 'per-match' denominator.                                                                                                                                                                                                                           |
| Number of athlete-exposures (athlete-participations) | 17 685 | Nil                   | Count of the number of players who took the field over 434 matches (players can be substituted for tactical purposes or replaced due to injury)                                                                        | The similarity to the number of player hours is coincidental; there are 40 hours of player-time per match, and the average number of athlete exposures per match over this series of matches was 40.8.                                                                    |
| <b>Risk measures</b>                                 |        |                       |                                                                                                                                                                                                                        |                                                                                                                                                                                                                                                                           |
| Period prevalence (percentage of cohort injured)     | 3%     | $(48/1403)*100$       | Percentage of people who appeared in matches who were replaced                                                                                                                                                         | Often reported as 'risk per season' or 'risk per year'. Can't be easily used to compare between activities if the duration of surveillance varies from activity to activity. The longer the surveillance period, the higher the risk will appear to be for closed cohorts |
| Injuries per 1 000 player-hours                      | 3.1    | $(53/17\ 360)*1\ 000$ | The number of injuries is divided by the number of hours of player exposure, and multiplied by a scaling factor (e.g. 1 000, 10 000) to provide a rate that is convenient to work with (e.g. numbers in the range of 1 | The most commonly reported metric of injury rates in studies of rugby injury epidemiology has been rate of injuries per 1 000 player-hours. This convention is endorsed in the consensus document by Fuller et al. <sup>2</sup>                                           |

| Statistic                                                     | Value | Calculation         | Explanation                                                                                                                                                                                                                                                   | Comment                                                                                                                                                                                                                                                                                                                                                       |
|---------------------------------------------------------------|-------|---------------------|---------------------------------------------------------------------------------------------------------------------------------------------------------------------------------------------------------------------------------------------------------------|---------------------------------------------------------------------------------------------------------------------------------------------------------------------------------------------------------------------------------------------------------------------------------------------------------------------------------------------------------------|
|                                                               |       |                     | to 1 000 rather than numbers less than zero or greater than 1 000                                                                                                                                                                                             | It is relatively simple to estimate based on the number of matches played. Comparisons of incidence rates between activities or within activities over time based on this denominator require the assumption that the number and characteristics of energy transfers to which participants are exposed remains relatively constant per unit of exposure time. |
| Injuries per 1 000 matches                                    | 122   | $(53/434)*1\ 000$   | Rate of tackler replacements per rugby union match multiplied by 1 000. The rate per match is multiplied by a factor that provides a convenient interpretation; 0.12 carrier replacement injuries per match; 12.2 per 100 matches, 122 per 1 000 matches etc. | Ignores number of players and match duration, and provides an estimate of the number of injuries an observer would expect to see if they watched 1 000 matches. Not useful for comparing incidence rates between activities of differing durations or numbers of participants.                                                                                |
| Injuries per 1 000 hours of play (ignoring number of players) | 92    | $(53/579)*1\ 000$   | The rate per hour is multiplied by a factor that provides a convenient interpretation; 0.9 carrier replacement injuries per hour; 9.2 per 100 hours, 92 per 1 000 hours etc.                                                                                  | Ignores number of players, and provides an estimate of the number of injuries an observer would expect to see if they watched 1 000 hours of play. Not useful for comparing between activities with differing numbers of participants (because the sizes of the populations at risk differ)                                                                   |
| Injuries per 1 000 athlete-exposures                          | 3.0   | $(53/17685)*1\ 000$ | Carrier injury replacements per 1 000 athlete exposures                                                                                                                                                                                                       | Injuries per 1 000 athlete exposures are commonly reported in injury surveillance in the United States. Problematic for comparing between activities that                                                                                                                                                                                                     |

| Statistic                                                                            | Value | Calculation         | Explanation                                              | Comment                                                                                                                                                                                                                        |
|--------------------------------------------------------------------------------------|-------|---------------------|----------------------------------------------------------|--------------------------------------------------------------------------------------------------------------------------------------------------------------------------------------------------------------------------------|
| (athlete-participations)                                                             |       |                     |                                                          | have different numbers of typical athlete exposures per match, or when the average exposure time per player changes over time.                                                                                                 |
| Injuries per 1 000 full player matches                                               | 4.1   | $(53/13020)*1\ 000$ |                                                          | Not commonly used. It ignores the duration of the match, and as such has similar drawbacks to reporting injuries per athlete exposure, because the time-window of exposure varies between activities of different durations.   |
| Injuries per 1 000 'ball in play' player-hours                                       | 6.8   | $(53/7740)*1\ 000$  |                                                          | Not commonly used, but technically a more accurate measure of exposure than injuries per 1 000 player-hours, because players are only exposed to tackles when the ball is 'in play'.                                           |
| Injuries per 1 000 'ball in play and ball-carrier's team in possession' player-hours | 13.5  | $(53/3819)*1\ 000$  |                                                          | Again, not commonly used, but an even closer approximation of actual time exposed to the risk of ball carrier injuries. Players are only tackled when the ball is in play and their team is in possession.                     |
| Injuries per 1 000 tackle events                                                     | 1.2   | $(53/43366)*1\ 000$ | Ball-carrier injury replacements per 1 000 times tackled | Provides an accurate assessment of per-event injury rates, but in isolation ignores frequency of occurrence of the event of interest. Injury rates per event have been sometimes been termed 'injury propensity'. <sup>3</sup> |

---

| <b>Statistic</b>                    | <b>Value</b> | <b>Calculation</b>                 | <b>Explanation</b> | <b>Comment</b>                                                                                                                                                                                                                                                                                                            |
|-------------------------------------|--------------|------------------------------------|--------------------|---------------------------------------------------------------------------------------------------------------------------------------------------------------------------------------------------------------------------------------------------------------------------------------------------------------------------|
| Injuries per 1 000 players per year | 24           | (23+17+13)*1 000/<br>(983+589+627) |                    | Sometimes provided as a gross estimate of injury risk when participant numbers and injury numbers are available, but no measure of exposure for players is available (e.g. data derived from insurance claims combined with registers of participants). Of limited use when exposure varies by subgroup or across sports. |

---

## References

1. Quarrie KL, Hopkins WG. Tackle injuries in professional Rugby Union. *Am J Sports Med* 2008;36(9):1705-16. doi: 10.1177/0363546508316768 [published Online First: 2008/05/23]
2. Fuller CW, Molloy MG, Bagate C, et al. Consensus statement on injury definitions and data collection procedures for studies of injuries in rugby union. *Br J Sports Med* 2007;41(5):328-31. doi: 10.1136/bjism.2006.033282
3. Fuller CW, Brooks JH, Cancea RJ, et al. Contact events in rugby union and their propensity to cause injury. *Br J Sports Med* 2007;41:862-67.
